# Supplementary material for: Effects of Artemisia macrocephala Jacquem on Memory Deficits and Brain Oxidative Stress in Streptozotocin-Induced Diabetic Mice
Source: MDPI journal article supplement (doi:10.3390/molecules27082399), 2022-04-08
Supplement: s1 [file s1]

Supplementary file

# Effects of *Artemisia macrocephala* Jacquem on Memory Deficits and Brain Oxidative Stress in Streptozotocin Induced Diabetic Mice

Atiqul Bari <sup>1</sup>, Syed Muhammad Mukarram Shah <sup>1</sup>, Fakhria A. Al-Joufi <sup>2</sup>, Syed Wadood Ali Shah <sup>3,\*</sup>, Mohammad Shoaib <sup>3</sup>, Ismail Shah <sup>4</sup>, Muhammad Zahoor <sup>5,\*</sup>, Muhammad Naeem Ahmed <sup>6</sup>, Mehreen Ghias <sup>3</sup>, Syed Muhammad Hassan Shah <sup>7</sup> and Atif Ali Khan Khalil <sup>8</sup>

## Supplementary information

**Table S1.** Cholinesterase (AChE and BuChE) inhibitory activity of crude extract and fractions.

| Sample Test | Conc.<br>(µg/mL) | AChE         |                          | BChE         |                          |
|-------------|------------------|--------------|--------------------------|--------------|--------------------------|
|             |                  | % Inhibition | IC <sub>50</sub> (µg/mL) | % Inhibition | IC <sub>50</sub> (µg/mL) |
| Crd-Am      | 6.25             | 25.09±0.91   | 116.36±1.48              | 20.60±0.93   | 240.52±1.35              |
|             | 15.5             | 23.61±1.15   |                          | 17.19±1.44   |                          |
|             | 31.25            | 34.10±1.21   |                          | 27.09±1.25   |                          |
|             | 62.5             | 45.61±1.09   |                          | 35.77±1.31   |                          |
|             | 125              | 53.71±1.48   |                          | 43.12±1.49   |                          |
|             | 250              | 57.14±1.33   |                          | 51.97±1.35   |                          |
|             | 500              | 65.09±1.67   |                          | 57.12±1.40   |                          |
|             | 1000             | 69.24±1.41   |                          | 61.43±1.33   |                          |
| nhex-Am     | 6.25             | 09.96±0.76   | 934.75±1.21              | 13.77±0.83   | 509.26±1.14              |
|             | 15.5             | 13.07±0.92   |                          | 17.96±1.09   |                          |
|             | 31.25            | 17.11±1.51   |                          | 21.89±1.40   |                          |
|             | 62.5             | 21.29±1.38   |                          | 34.12±1.37   |                          |
|             | 125              | 25.56±1.27   |                          | 39.09±1.24   |                          |
|             | 250              | 39.20±1.51   |                          | 43.72±1.38   |                          |
|             | 500              | 46.51±1.44   |                          | 49.09±1.14   |                          |
|             | 1000             | 53.49±1.21   |                          | 54.12±1.61   |                          |
| Chl-Am      | 6.25             | 29.88±1.03   | 52.68±1.09               | 26.12±0.99   | 57.45±1.39               |
|             | 15.5             | 35.21±1.13   |                          | 31.90±1.11   |                          |
|             | 31.25            | 38.52±1.21   |                          | 35.61±1.28   |                          |
|             | 62.5             | 59.31±1.09   |                          | 54.39±1.39   |                          |
|             | 125              | 63.44±1.12   |                          | 60.91±1.30   |                          |
|             | 250              | 73.79±1.29   |                          | 70.62±1.44   |                          |
|             | 500              | 77.22±1.44   |                          | 73.19±1.51   |                          |
|             | 1000             | 86.91±1.38   |                          | 80.14±1.34   |                          |
| Et-Am       | 6.25             | 25.87±1.11   | 75.19±1.02               | 23.66±1.03   | 116.58±1.09              |

|                  |       |            |                    |            |                    |
|------------------|-------|------------|--------------------|------------|--------------------|
|                  | 15.5  | 30.93±1.09 |                    | 31.08±0.85 |                    |
|                  | 31.25 | 35.10±0.96 |                    | 35.86±1.01 |                    |
|                  | 62.5  | 41.56±1.02 |                    | 45.57±1.14 |                    |
|                  | 125   | 61.41±1.17 |                    | 53.61±1.09 |                    |
|                  | 250   | 63.60±1.21 |                    | 57.22±1.36 |                    |
|                  | 500   | 70.23±1.19 |                    | 67.08±1.29 |                    |
|                  | 1000  | 78.12±1.33 |                    | 74.21±1.48 |                    |
| <b>But-Am</b>    | 6.25  | 19.11±1.19 | <b>254.66±1.34</b> | 13.45±0.91 | <b>265.33±1.41</b> |
|                  | 15.5  | 25.71±1.30 |                    | 20.97±1.17 |                    |
|                  | 31.25 | 30.12±1.22 |                    | 26.28±1.29 |                    |
|                  | 62.5  | 42.11±1.42 |                    | 43.73±1.45 |                    |
|                  | 125   | 44.43±1.50 |                    | 43.98±1.35 |                    |
|                  | 250   | 49.09±1.34 |                    | 47.11±1.41 |                    |
|                  | 500   | 57.12±1.41 |                    | 56.30±1.33 |                    |
|                  | 1000  | 67.61±1.39 |                    | 62.19±1.49 |                    |
| <b>Aq-Am</b>     | 6.25  | 15.60±0.93 | <b>502.71±1.28</b> | 14.72±0.98 | <b>513.66±1.33</b> |
|                  | 15.5  | 19.67±1.22 |                    | 17.96±1.25 |                    |
|                  | 31.25 | 25.29±1.25 |                    | 24.11±1.41 |                    |
|                  | 62.5  | 32.76±1.37 |                    | 29.61±1.30 |                    |
|                  | 125   | 34.81±1.20 |                    | 32.97±1.21 |                    |
|                  | 250   | 42.87±1.39 |                    | 41.96±1.37 |                    |
|                  | 500   | 49.73±1.28 |                    | 48.67±1.33 |                    |
|                  | 1000  | 56.12±1.33 |                    | 54.83±1.29 |                    |
| <b>Donepezil</b> | 6.25  | 61.98±0.67 | <b>5.04±0.67</b>   | 77.89±0.71 | <b>4.01±0.71</b>   |
|                  | 15.5  | 73.67±1.01 |                    | 86.41±1.13 |                    |
|                  | 31.25 | 81.28±1.19 |                    | 90.12±1.29 |                    |
|                  | 62.5  | 85.12±1.31 |                    | 95.80±1.47 |                    |
|                  | 125   | 93.88±1.49 |                    | 98.16±1.40 |                    |
|                  | 250   | 97.12±1.41 |                    | 99.08±1.37 |                    |
|                  | 500   | 97.27±1.39 |                    | 99.10±1.35 |                    |
|                  | 1000  | 98.10±1.53 |                    | 99.77±1.30 |                    |

All values are expressed as Mean ± SEM.

**Table S2.** Effect of crude extract and fractions of *A. macrocephala* on mice in novel object recognition test (NORT) in short term memory.

| Treatment/Dose   | Sample Phase      |                  | Test Phase               |                           | DI (%)     |
|------------------|-------------------|------------------|--------------------------|---------------------------|------------|
|                  | Identical Object  | Identical Object | Novel Object             | Familiar Object           |            |
|                  | A1                | A2               | A1                       | A2                        |            |
| <b>Control</b>   | <b>18.98±0.63</b> | 18.31±0.73       | 18.71±0.45               | 16.98±0.53                | 52.42±1.88 |
| <b>Diabetic</b>  | 8.97±0.70         | 7.79±0.86        | 6.39±0.52 <sup>###</sup> | 13.01±0.71                | 32.93±1.91 |
| <b>Crd-Am</b>    | <b>100mg</b>      | 14.71±0.78       | 14.97±0.80               | 14.31±0.68 <sup>**</sup>  | 55.81±1.76 |
|                  | <b>200mg</b>      | 15.11±0.46       | 15.03±0.78               | 14.39±0.79 <sup>**</sup>  | 57.21±1.54 |
| <b>nhex-Am</b>   | <b>75mg</b>       | 14.89±0.72       | 15.31±0.56               | 10.76±0.68 <sup>*</sup>   | 44.74±1.56 |
|                  | <b>150mg</b>      | 14.83±0.83       | 14.87±0.70               | 10.91±0.91 <sup>**</sup>  | 45.13±1.92 |
| <b>Chl-Am</b>    | <b>75mg</b>       | 14.91±0.84       | 15.01±0.77               | 14.54±0.81 <sup>***</sup> | 60.86±1.81 |
|                  | <b>150mg</b>      | 14.73±0.91       | 15.12±0.52               | 15.05±0.48 <sup>***</sup> | 62.03±1.98 |
| <b>Et-Am</b>     | <b>75mg</b>       | 14.91±0.75       | 14.88±0.73               | 14.43±0.81 <sup>**</sup>  | 57.76±1.71 |
|                  | <b>150mg</b>      | 14.86±0.66       | 14.93±0.79               | 14.22±0.90 <sup>**</sup>  | 58.16±1.96 |
| <b>But-Am</b>    | <b>75mg</b>       | 14.96±0.75       | 14.99±0.50               | 11.56±0.53 <sup>*</sup>   | 46.85±1.77 |
|                  | <b>150mg</b>      | 14.83±0.77       | 15.08±0.84               | 11.39±0.67 <sup>*</sup>   | 46.18±1.69 |
| <b>Aq-Am</b>     | <b>75mg</b>       | 14.81±0.66       | 14.72±0.81               | 11.65±0.86 <sup>**</sup>  | 48.26±1.73 |
|                  | <b>150mg</b>      | 15.09±0.70       | 15.04±0.56               | 11.48±0.74 <sup>*</sup>   | 47.07±1.78 |
| <b>Donepezil</b> | <b>2mg</b>        | 14.98±0.90       | 14.64±0.61               | 14.92±0.84 <sup>***</sup> | 64.09±2.01 |
| <b>Metformin</b> | <b>50mg</b>       | 14.69±0.83       | 15.08±0.56               | 15.07±0.79 <sup>***</sup> | 62.03±1.87 |

All values are expressed as Mean±SEM (n=6). Oneway ANOVA after which Dunnett's post hoc multiple comparison test. <sup>###</sup>P<0.001 comparison of STZ treated diabetic (amnesic) group vs. normal control, <sup>\*</sup>P<0.05, <sup>\*\*</sup>P<0.01 and <sup>\*\*\*</sup>P<0.001 as comparison of STZ treated diabetic (amnesic) group vs. Donepezil, Metformin, crude extract and fractions-treated groups, using one way ANOVA followed by Dunnett comparison. Crude extract (Crd-Am), hexane (nhex-Am), chloroform (Chl-Am), ethyl acetate (Et-Am), butanol (But-Am) and aqueous (Aq-Am) fraction.

**Table S3.** Effect of crude extract and fractions of *A. macrocephala* on mice in novel object recognition test (NORT) in long term memory.

| Treatment/Dose | Sample Phase     |                  | Test Phase               |                           | DI (%)     |
|----------------|------------------|------------------|--------------------------|---------------------------|------------|
|                | Identical Object | Identical Object | Novel Object             | Familiar Object           |            |
|                | A1               | A2               | A1                       | A2                        |            |
| Control        | 20.30±0.93       | 21.81±0.84       | 15.95±0.79               | 11.68±0.78                | 57.72±1.91 |
| Diabetic       | 13.08±0.68       | 11.41±0.88       | 6.26±0.52 <sup>###</sup> | 13.28±0.69                | 32.03±1.83 |
| Crd-Am         | 100mg            | 18.43±0.87       | 16.73±0.79               | 14.85±0.87 <sup>**</sup>  | 56.72±1.89 |
|                | 200mg            | 17.23±0.88       | 19.06±0.72               | 17.01±0.77 <sup>***</sup> | 58.51±2.05 |
| nhex-Am        | 75mg             | 18.31±0.97       | 16.64±0.89               | 10.74±0.68 <sup>**</sup>  | 46.63±1.88 |
|                | 150mg            | 17.06±0.62       | 19.40±0.62               | 10.99±0.89 <sup>***</sup> | 45.32±1.91 |
| Chl-Am         | 75mg             | 18.50±0.70       | 16.65±0.74               | 17.42±0.77 <sup>**</sup>  | 63.39±2.08 |
|                | 150mg            | 17.56±0.67       | 19.02±0.58               | 19.21±0.89 <sup>***</sup> | 64.07±2.11 |
| Et-Am          | 75mg             | 18.35±0.81       | 16.83±0.70               | 16.70±0.72 <sup>**</sup>  | 59.53±1.97 |
|                | 150mg            | 17.30±0.96       | 19.16±0.78               | 17.71±0.69 <sup>***</sup> | 60.98±1.89 |
| But-Am         | 75mg             | 18.53±0.84       | 16.78±0.84               | 11.06±0.57 <sup>**</sup>  | 47.73±1.82 |
|                | 150mg            | 17.40±0.79       | 19.22±0.81               | 11.39±0.67 <sup>***</sup> | 48.06±1.88 |
| Aq-Am          | 75mg             | 18.47±0.87       | 16.76±0.70               | 11.65±0.63 <sup>**</sup>  | 48.93±1.85 |
|                | 150mg            | 17.36±0.76       | 19.13±0.60               | 12.05±0.67 <sup>***</sup> | 49.87±1.79 |
| Donepezil      | 2mg              | 16.45±0.83       | 17.95±0.63               | 23.94±0.84 <sup>***</sup> | 66.11±1.97 |
| Metformin      | 50mg             | 18.23±0.88       | 17.13±0.68               | 17.12±0.87 <sup>**</sup>  | 62.52±2.01 |

Mean ± SEM (n=6). Oneway ANOVA after which Dunnett's post hoc multiple comparison test. <sup>###</sup>P<0.001 comparison of STZ treated diabetic (amnesic) group vs. normal control, \*P<0.05, \*\*P<0.01 and \*\*\*P<0.001 as comparison of STZ treated diabetic (amnesic) group vs. Donepezil, Metformin, crude extract and fractions-treated groups, using one way ANOVA followed by Dunnet comparison. Crude extract (Crd-Am), hexane (nhex-Am), chloroform (Chl-Am), ethyl acetate (Et-Am), butanol (But-Am) and aqueous (Aq-Am) fraction.

**Table S4.** Effect of Crd-Am and fractions on AChE and ACh level in brain.

| Sample Test |       | AChE                                              | ACh                       |
|-------------|-------|---------------------------------------------------|---------------------------|
|             |       | (μmoles of substrate hydrolysed / min / g tissue) | (mmol/min/mg protein)     |
| Control     |       | 12.01±1.13                                        | 16.21±1.33                |
| Diabetic    |       | 28.92±1.23 <sup>\$\$\$</sup>                      | 6.17±1.19 <sup>##</sup>   |
| Crd-Am      | 100mg | 16.11±1.08 <sup>*</sup>                           | 12.87±1.21 <sup>*</sup>   |
|             | 200mg | 15.09±1.15 <sup>**</sup>                          | 13.33±1.26 <sup>**</sup>  |
| Chl-Am      | 75mg  | 14.01±1.01 <sup>***</sup>                         | 13.48±1.22 <sup>**</sup>  |
|             | 150mg | 13.61±1.34 <sup>***</sup>                         | 13.92±1.45 <sup>***</sup> |
| Et-Am       | 75mg  | 15.03±1.12 <sup>**</sup>                          | 13.09±1.39 <sup>**</sup>  |
|             | 150mg | 14.98±1.27 <sup>**</sup>                          | 13.37±1.25 <sup>**</sup>  |
| Donepezil   | 2mg   | 12.38±1.36 <sup>***</sup>                         | 15.08±1.44 <sup>***</sup> |
| Metformin   | 50mg  | 11.92±1.19 <sup>***</sup>                         | 15.17±1.51 <sup>***</sup> |

Mean±SEM (n = 6). Oneway ANOVA after which Dunnett's post hoc multiple comparison test. <sup>\$\$\$</sup> P<0 001, <sup>##</sup>P<0 001 comparison of STZ treated diabetic (amnesic) group vs. normal control, \*P<0.05, \*\*P<0.01 and \*\*\*P<0.001 as comparison of STZ treated diabetic (amnesic) group vs. Donepezil, Metformin, crude extract and fractions-treated groups, using one way ANOVA followed by Dunnet comparison. Crude extract (Crd-Am), chloroform (Chl-Am) and ethyl acetate (Et-Am) fraction.
